using regression formulas, as Thys and Hillel state, comparative information about ventricular volumes, ejection fraction, and cardiac output during anesthesia is available from only one<sup>8</sup> of four prior M-mode studies reported in the anesthesia literature.<sup>2,8-10</sup> Therefore, direct comparisons of M-mode derived volumes with our two-dimensional volumes are difficult.

In our study, significant differences between halothane and isoflurane in ejection fraction, stroke volume index, and mean blood pressure were observed only following a fluid bolus. This difference between halothane and isoflurane could have related to a difference in contractility or afterload. Since neither contractility nor afterload could be directly measured, we believe (and so stated) that more studies are necessary before concluding that clinically important differences exist in contractility between equianesthetic concentrations of halothane and isoflurane in infants and small children.

The non-invasive measurements of contractility provided by M-mode techniques, when combined with the more global non-invasive assessments of myocardial performance provided by two-dimensional echocardiography and Doppler echocardiography, may be complementary. If so, then the techniques could be combined to enhance information about the cardiovascular effects of anesthetics. All the echocardiographic methods have limitations that should be understood by readers when interpreting studies using these measurement techniques.

DAVID MURRAY, M.D.  
*Assistant Professor*  
*Department of Anesthesiology*  
*The University of Iowa*  
*Iowa City, Iowa 52242*

Anesthesiology  
68:647, 1988

### Sir Robert Macintosh—Not MacIntosh

*To the Editor:—*  
Doc Epstein's eloquent ink<sup>1</sup>  
Lauds outstanding Raymond Fink  
With praise, and with prose  
That reminds us of those  
Like Sir Rob and Ralph Waters  
Who in laryngeal quarters  
Were joined by Doc Ray  
To make an airway.  
But Sir Robert might spy  
With perceptive i (eye)  
An upper case I  
Where a lower should lie.

### REFERENCES

1. Murray D, Vandewalker G, Matherne GP, Mahoney LT: Pulsed Doppler and two-dimensional echocardiography: Comparison of halothane and isoflurane on cardiac function in infants and small children. *ANESTHESIOLOGY* 67:211-217, 1987
2. Wolf WJ, Neal MB, Peterson MD: The hemodynamic and cardiovascular effects of isoflurane and halothane anesthesia in children. *ANESTHESIOLOGY* 64:328-333, 1986
3. Folland ED, Parisi AF, Moynihan PF, Jones DR, Feldman CL, Tow DE: Assessment of left ventricular ejection fraction and volumes by real-time, two-dimensional echocardiography: A comparison of cine-angiographic and radionuclide techniques. *Circulation* 60:760-766, 1979
4. Schiller NB, Acquatella H, Ports TA, Drew D, Goerke J, Ringertz H, Silverman NH, Brundage B, Botvinick EH, Boswell R, Carlsson E, Parmley WW: Left ventricular volume from paired biplane two-dimensional echocardiography. *Circulation* 60:547-555, 1979
5. Mercier JC, DiSessa TG, Jarmakani JM, Nakashini T, Hiaishi S, Isabel-Jones J, Friedman WF: Two-dimensional echocardiographic assessment of left ventricular volumes and ejection fraction in children. *Circulation* 65:962-969, 1982
6. Meyer RA: Echocardiography-application in assessing cardiac performance in clinical care. *ANESTHESIOLOGY* 49:71-78, 1978
7. Schmittger I, Gordon EP, Kritl-Gerald PJ, Pop RL: Standardized intracardiac measurements of two-dimensional echocardiography. *J Am Coll Cardiol* 2:934-938, 1983
8. Barash PE, Ganz S, Katz JD, Taunt K, Talner S: Ventricular function in children during halothane anesthesia. *ANESTHESIOLOGY* 49:79-85, 1978
9. Gerson JI, Gianaris LE: Echocardiographic analysis of human left ventricular diastolic volume and cardiac performance during halothane anesthesia. *Anesth Analg* 58:23-29, 1978
10. Rathod R, Jacobs HK, Kramer NE, Rao TL, Salem MR, Towne WD: Echocardiographic assessment of ventricular performance following induction with two anesthetics. *ANESTHESIOLOGY* 49:86-90, 1978

(Accepted for publication December 3, 1987.)

GERALD L. ZEITLIN, M.D.  
*Department of Anesthesiology*  
*Lahey Clinic Medical Centre*  
*41 Mall Road*  
*Burlington, Massachusetts 01805*

### REFERENCE

1. Epstein RN: ASA Award: B. Raymond Fink. *ANESTHESIOLOGY* 67:456-458, 1987

(Accepted for publication December 3, 1987.)
